# Supplementary material for: Induction of IL-25 secretion from tumour-associated fibroblasts suppresses mammary tumour metastasis
Source: PubMed Central journal article supplement (PMC4837478; doi:10.1038/ncomms11311), 2016-04-18
Supplement: ncomms11311-s1.pdf [file ncomms11311-s1.pdf]

Supplementary Figure 1:

a

0 week after drug administration

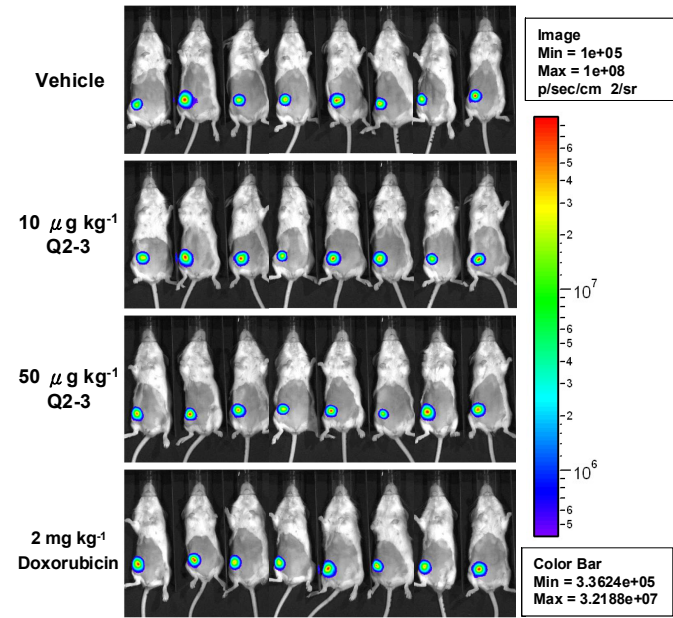

3 weeks after drug administration

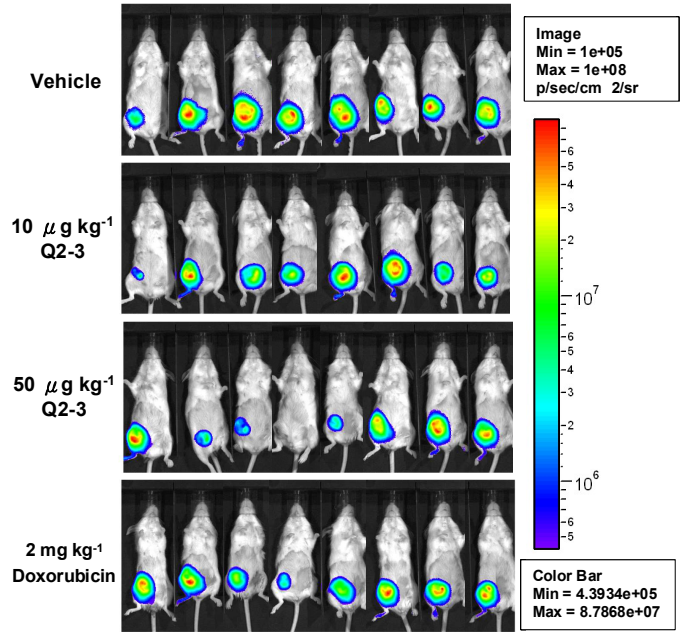

b

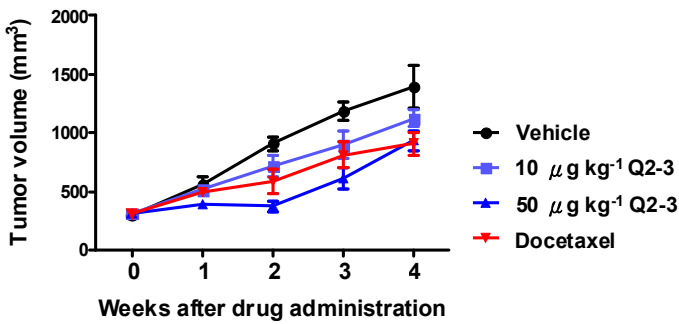

“Vehicle” v.s “10 µg kg<sup>-1</sup> Q2-3”  $P > 0.05$ , n.s  
 “Vehicle” v.s “50 µg kg<sup>-1</sup> Q2-3”  $P < 0.05$ , \*

c

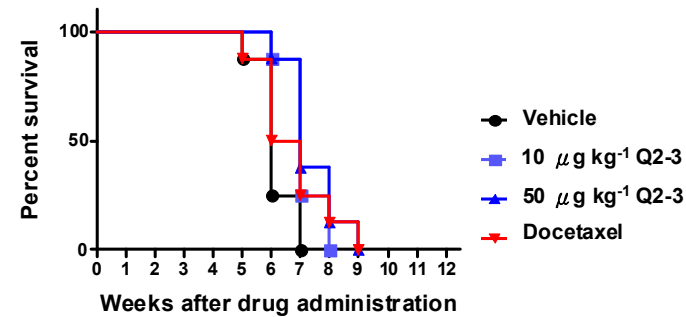

“Vehicle” v.s “10 µg kg<sup>-1</sup> Q2-3”  $P > 0.05$ , n.s  
 “Vehicle” v.s “50 µg kg<sup>-1</sup> Q2-3”  $P < 0.05$ , \*

Supplementary Figure 1. In vivo treatment of Q2-3 suppresses the growth of mouse (4T1) mammary tumor *in situ*.

(a) Representative bioluminescent images of mice (n = 8 per group) with 4T1 mammary carcinoma *in situ*, after in vivo treatment with PBS (Vehicle, 0.1% DMSO in saline), Q2-3 (10 or 50 µg kg<sup>-1</sup>; 3 injections week<sup>-1</sup>), docetaxel (2 mg kg<sup>-1</sup>) for 0 and 3 weeks. (b) Quantification of tumor volume (mm<sup>2</sup>) in mice, as determined from the length (A) and width (B) of test tumors by the formula  $V = A \times B^2/2$ . (c) Survival of test mice after different treatments. n.s, no significant. \*, significance of  $P < 0.05$  (Kaplan–Meier results were analyzed by log-rank test), when compared with the mice in vehicle control group. Similar results were obtained from two independent experiments.

Supplementary Fig 2:

a

0 week after drug administration

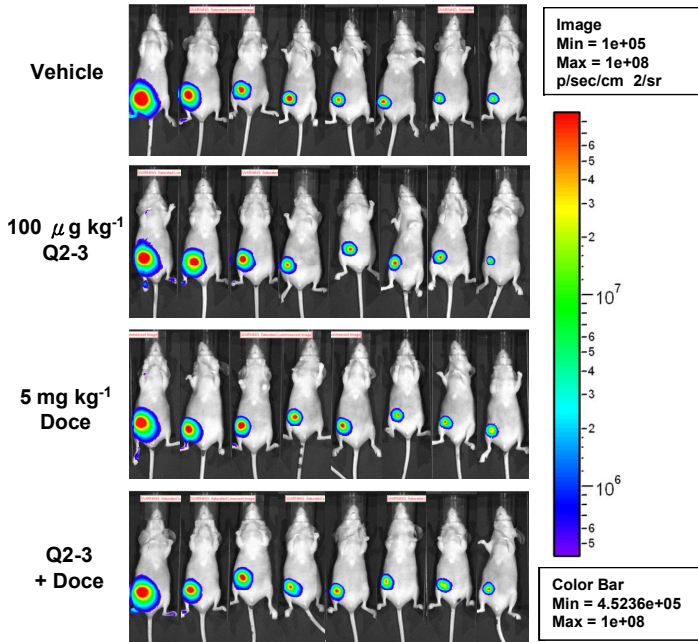

3 weeks after drug administration

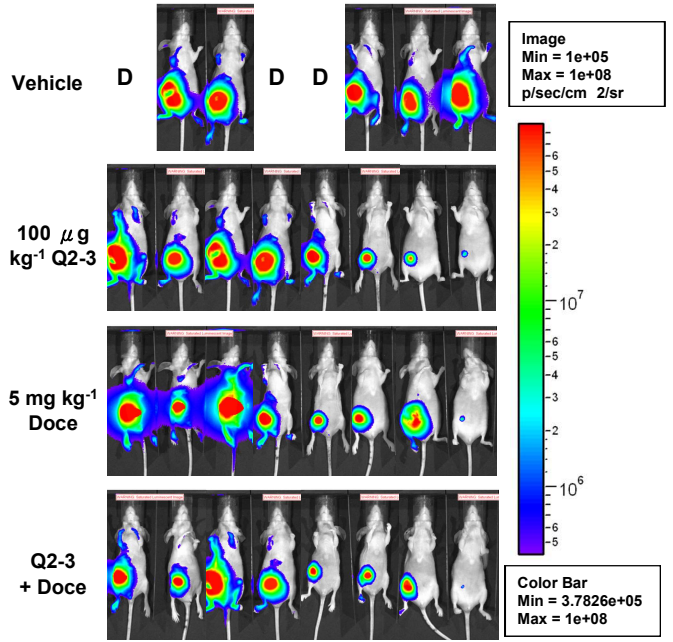

b

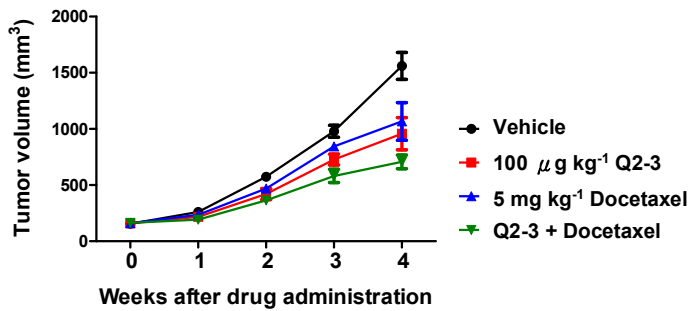

“Vehicle” v.s “100 µg kg<sup>-1</sup> Q2-3”  $P < 0.05, *$   
 “5 mg kg<sup>-1</sup> Docetaxel” v.s “Q2-3 + Docetaxel”  $P < 0.05, *$

c

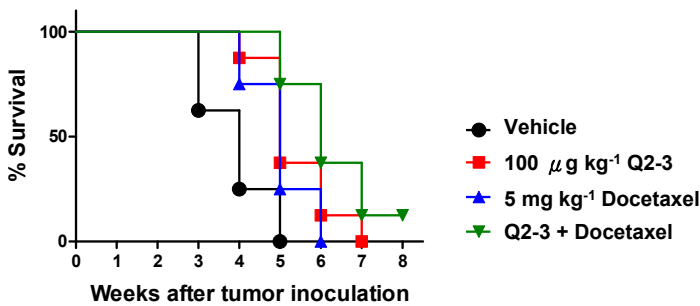

“Vehicle” v.s “100 µg kg<sup>-1</sup> Q2-3”  $P < 0.05,$   
 \*5 mg kg<sup>-1</sup> Docetaxel” v.s “Q2-3 + Docetaxel”  $P > 0.05, n.s$

Supplementary Figure 2. **In vivo treatment of Q2-3 suppresses the growth of human (MDA-MB-231) mammary tumor *in situ*.** (a) Representative bioluminescent images of mice ( $n = 8$  per group) with MDA-MB-231 mammary carcinoma *in situ*, after in vivo treatment with PBS (Vehicle, 0.1% DMSO in saline), Q2-3 ( $100 \mu\text{g kg}^{-1}$ ; 3 injections week<sup>-1</sup>), docetaxel ( $5 \text{ mg kg}^{-1}$ ) or co-treatment with docetaxel and Q2-3 for 0 and 3 weeks. Labelling with “D” in photograph denotes the mice were died before image taken. (b) Quantification of tumor volume ( $\text{mm}^2$ ) in mice, as determined from the length (A) and width (B) of test tumors by the formula  $V = A \times B^2/2$ . (c) Survival of test mice after different treatments. n.s, no significant. \*, significance of  $P < 0.05$ , as indicated comparisons. Similar results were obtained from two independent experiments.

**Supplementary Fig 3:**

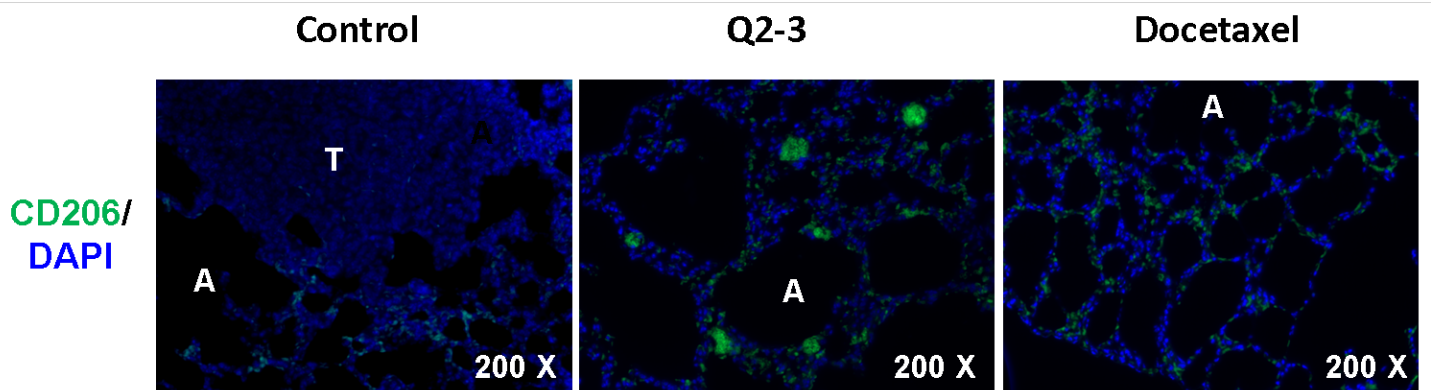

**Supplementary Figure 3. Q2-3 treatment significantly induces the expansion of pulmonary macrophages in lung tissues of Q2-3-treated mice.** The presence of CD206<sup>+</sup> cells (green) indicates the clustering of macrophages in lung tissue of Q2-3-treated mice, rather than in control or docetaxel-treated mice.

Supplementary Fig 4

Figure 3d

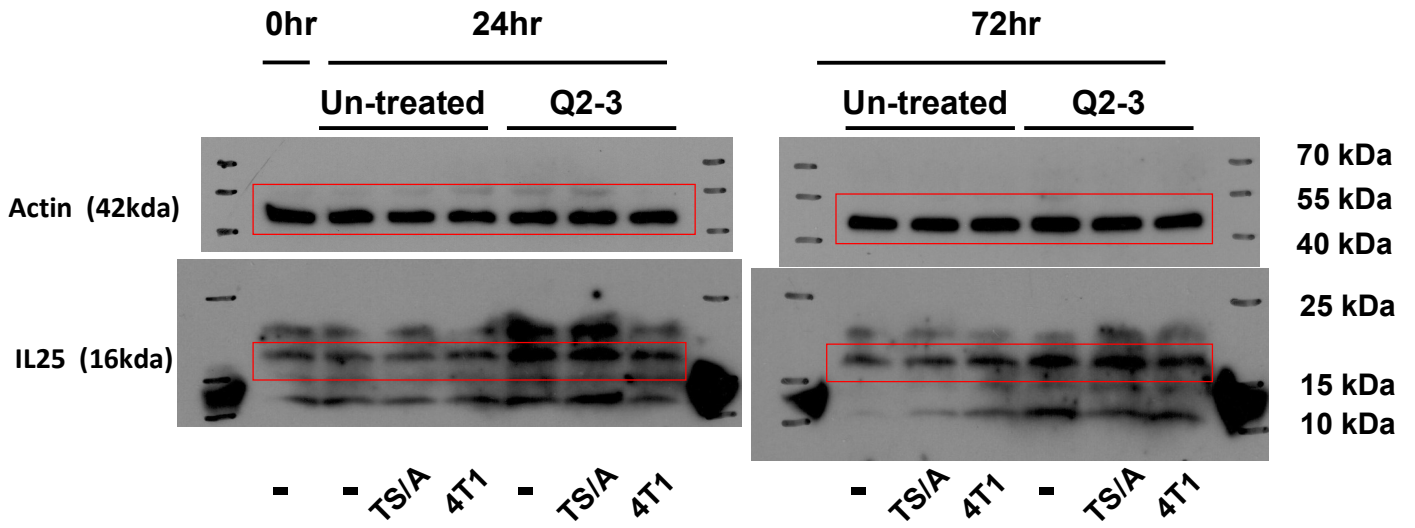

Figure 3e

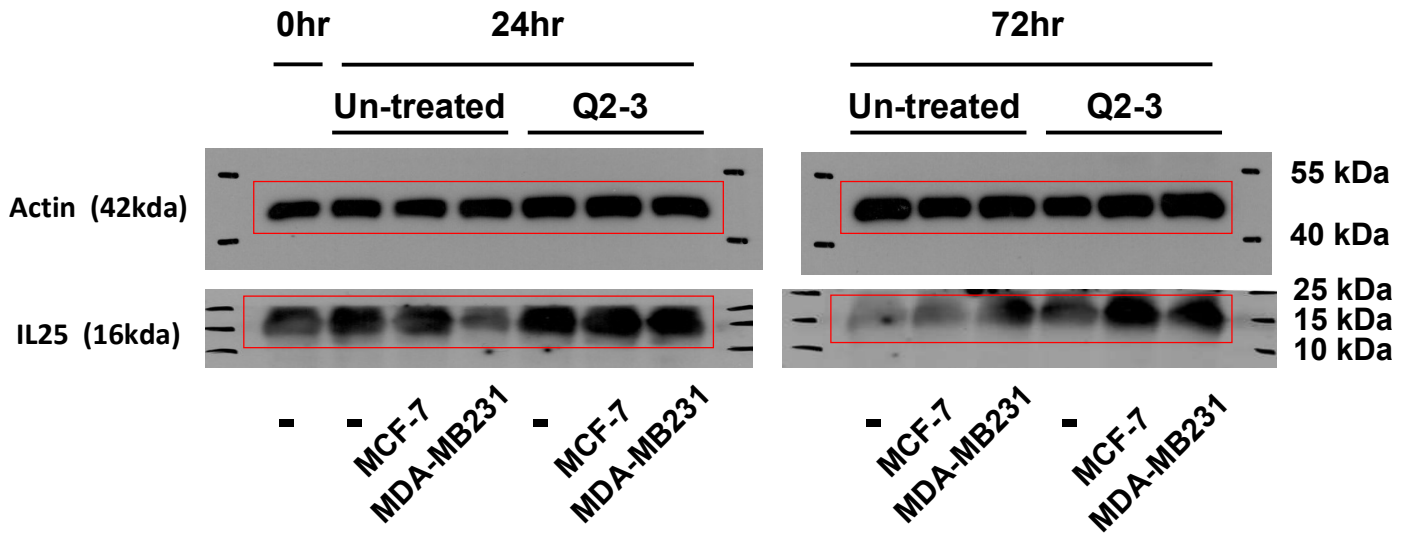

Supplementary Figure 4. Uncropped scans of four key western blot analyses on IL-25 expression from Q2-3-treated fibroblasts. Areas shown in Figure 3d and 3e are enclosed in red boxes and the molecular weight markers are shown on the right panel.
